# Supplementary material for: Morphological and Ecogeographic Study of the Diversity of Cassava (Manihot esculenta Crantz) in Ecuador
Source: MDPI journal article supplement (doi:10.3390/agronomy11091844), 2021-09-14
Supplement: s1 [file s1]

Archive with 1 entries (1 files):
- agronomy-1324061-supplementary.pdf
