# Supplementary material for: Morphological and Ecogeographic Study of the Diversity of Cassava (Manihot esculenta Crantz) in Ecuador
Source: MDPI journal article supplement (doi:10.3390/agronomy11091844), 2021-09-14
Supplement: s1 [file s1 › agronomy-1324061-supplementary.pdf]

## Supplementary Materials:

**Table S1.** Thematic layers used in the ecogeographic characterization in cassava collection.

| Variable                                                                   | Unit/category                                                                                   | Component * |
|----------------------------------------------------------------------------|-------------------------------------------------------------------------------------------------|-------------|
| Annual average temperature                                                 | °C                                                                                              | Bioclimatic |
| Isothermality                                                              | °C                                                                                              | Bioclimatic |
| Temperature seasonality                                                    | °C                                                                                              | Bioclimatic |
| Maximum temperature for the warmest month                                  | °C                                                                                              | Bioclimatic |
| Minimum temperature for the coldest month                                  | °C                                                                                              | Bioclimatic |
| Annual temperature range                                                   | °C                                                                                              | Bioclimatic |
| Average temperature for the coldest quarter (3 coldest months)             | °C                                                                                              | Bioclimatic |
| Average temperature for the quarter with most rainfall (3 rainiest months) | °C                                                                                              | Bioclimatic |
| Average temperature for the hottest quarter (3 hottest months)             | °C                                                                                              | Bioclimatic |
| Maximum temperature for January                                            | °C                                                                                              | Bioclimatic |
| Maximum temperature for February                                           | °C                                                                                              | Bioclimatic |
| Maximum temperature for March                                              | °C                                                                                              | Bioclimatic |
| Maximum temperature for April                                              | °C                                                                                              | Bioclimatic |
| Maximum temperature for May                                                | °C                                                                                              | Bioclimatic |
| Maximum temperature for June                                               | °C                                                                                              | Bioclimatic |
| Maximum temperature for July                                               | °C                                                                                              | Bioclimatic |
| Minimum temperature for January                                            | °C                                                                                              | Bioclimatic |
| Minimum temperature for February                                           | °C                                                                                              | Bioclimatic |
| Minimum temperature for March                                              | °C                                                                                              | Bioclimatic |
| Minimum temperature for April                                              | °C                                                                                              | Bioclimatic |
| Minimum temperature for May                                                | °C                                                                                              | Bioclimatic |
| Minimum temperature for June                                               | °C                                                                                              | Bioclimatic |
| Minimum temperature for July                                               | °C                                                                                              | Bioclimatic |
| Minimum temperature for August                                             | °C                                                                                              | Bioclimatic |
| Minimum temperature for September                                          | °C                                                                                              | Bioclimatic |
| Minimum temperature for October                                            | °C                                                                                              | Bioclimatic |
| Minimum temperature for December                                           | °C                                                                                              | Bioclimatic |
| Average temperature for January                                            | °C                                                                                              | Bioclimatic |
| Average temperature for February                                           | °C                                                                                              | Bioclimatic |
| Average temperature for March                                              | °C                                                                                              | Bioclimatic |
| Average temperature for April                                              | °C                                                                                              | Bioclimatic |
| Average temperature for May                                                | °C                                                                                              | Bioclimatic |
| Average temperature for June                                               | °C                                                                                              | Bioclimatic |
| Average temperature for July                                               | °C                                                                                              | Bioclimatic |
| Average temperature for August                                             | °C                                                                                              | Bioclimatic |
| Average temperature for October                                            | °C                                                                                              | Bioclimatic |
| Average temperature for December                                           | °C                                                                                              | Bioclimatic |
| Rainfall during the hottest quarter (3 hottest months)                     | mm                                                                                              | Bioclimatic |
| Average rainfall for May                                                   | mm                                                                                              | Bioclimatic |
| Average rainfall for August                                                | mm                                                                                              | Bioclimatic |
| Average rainfall for October                                               | mm                                                                                              | Bioclimatic |
| Elevation                                                                  | m                                                                                               | Geophysical |
| Slope                                                                      | 1 Flat (0–2°), Very smooth (2–5°),<br>Smooth (5–12°)                                            | Geophysical |
| Surface soil pH in a soil-water solution                                   | 1 Very acid, 2 Acid, 3 Moderately acid,<br>4 Slightly acid, 5 Practically neutral, 6<br>Neutral | Edaphic     |
| pH in subsoil in soil-water solution                                       | 1 Very acid, 2 Acid, 3 Moderately acid,<br>4 Slightly acid, 5 Practically neutral, 6<br>Neutral | Edaphic     |
| Organic carbon content in surface soil                                     | 1 Very low, 2 Low, 3 Medium, 4 High                                                             | Edaphic     |

|                                                 |                                                                            |         |
|-------------------------------------------------|----------------------------------------------------------------------------|---------|
| Total exchangeable bases in surface soil        | 1 Low fertility, 2 Medium fertility, 3 High fertility                      | Edaphic |
| Cation exchange capacity in surface soil        | 1 Very low, 2 Low, 3 Medium                                                | Edaphic |
| Clay cation exchange capacity in surface        | 1 Very low, 2 Low, 3 Medium, 4 High, 5 Very high                           | Edaphic |
| Apparent bulk density reference in surface soil | 1 Peaty horizons, 2 Volcanic soil horizons, 3 Clay horizons with structure | Edaphic |
| Apparent bulk density reference in subsoil      | 1 Peaty horizons, 2 Volcanic soil horizons, 3 Clay horizons with structure | Edaphic |
| Saturation of bases in surface soil             | 1 Very acidic soil, 2 Medium soil, 3 Soil saturated in bases               | Edaphic |
| Sand content of soil,                           | %                                                                          | Edaphic |
| Sand content of subsoil                         | %                                                                          | Edaphic |
| Gravel content of subsoil                       | %                                                                          | Edaphic |

---

\* Source for bioclimatic: WorldClim, Available online: <http://www.worldclim.org>, for geophysical: Shuttle Radar Mission, Available online: <http://srtm.csi.cgiar.org> (accessed on 4 February 2021), for edaphic: MAGAP, Available online: <http://geoportal.magap.gob.ec/geonetwork/srv/spa/main.home>. (accessed on 4 February 2021).
